# Supplementary material for: Levofloxacin prophylaxis in patients with newly diagnosed myeloma (TEAMM): a multicentre, double-blind, placebo-controlled, randomised, phase 3 trial
Source: PubMed Central journal article supplement (PMC6891230; doi:10.1016/s1470-2045(19)30506-6), 2019-12
Supplement: mmc1.pdf [file mmc1.pdf]

# THE LANCET Oncology

## Supplementary appendix

This appendix formed part of the original submission and has been peer reviewed.  
We post it as supplied by the authors.

Supplement to: Drayson M T, Bowcock S, Planche T, et al. Levofloxacin prophylaxis in patients with newly diagnosed myeloma (TEAMM): a multicentre, double-blind, placebo-controlled, randomised, phase 3 trial. *Lancet Oncol* 2019; published online October 23. [https://doi.org/10.1016/S1470-2045\(19\)30506-6](https://doi.org/10.1016/S1470-2045(19)30506-6).

**Table S1: List of TEAMM trial investigators by site in order of recruitment**

| Site                               | Investigators                                                                                                                                                                                                                     | No Randomised |
|------------------------------------|-----------------------------------------------------------------------------------------------------------------------------------------------------------------------------------------------------------------------------------|---------------|
| Queen Alexandra Hospital           | Helen Dignum, Alison Cook, Mary Ganczakowski, Kavitha Sooriyekumen, Charles Alderman, Katie Smith, Robert Corser, Edward Belsham, Gwynn Matthias, Inga Slepikiene, Izabela James, James Croft, Tanya Cranfield, Christopher James | 51            |
| Royal Stoke University Hospital    | Kamaraj Karunanithi, Neil Phillips                                                                                                                                                                                                | 39            |
| Russells Hall Hospital             | Stephen Jenkins, Rupert Hipkins, Savio Fernandes, Craig Taylor, Jeff Neilson                                                                                                                                                      | 38            |
| University Hospital, Coventry      | Anand Lokare, Syed Bokhari, Beth Harrison, Nick Jackson, David Lewis, Oliver Chapman, Rabia Afghan                                                                                                                                | 32            |
| Colchester General Hospital        | Michael Hamblin, Gavin Campbell, Marion Wood, Sudhakaran Makkuni, Mahalakshmi Mohan Pavel Kotouчек                                                                                                                                | 31            |
| Princess Royal University Hospital | Stella Bowcock, Anil Lakhani, Corrine DeLord, Mansour Ceesay, Siamak Arami, K Yip                                                                                                                                                 | 31            |
| St Helier Hospital                 | Simon Stern, Lydia Jones, Sneha Muthalali, Nicholas Fordham, Jane Mercieca, Shalini Solanki, Charlotte Pawlyn, Priya Srisikandarajah, Sandra Easdale, Ying Ying Peng                                                              | 28            |
| Medway Maritime Hospital           | Maadh Aldouri, Sarah Arnott, Handunneththi Mendis, Vivienne Andrews, Waseem Nagi, Ayed Eden, Vijayavalli Dhanapal                                                                                                                 | 26            |
| Kings Mill Hospital                | Rowena Faulkner, Ashish Masurekar, Tim Moorby                                                                                                                                                                                     | 25            |
| Sandwell General Hospital          | Farooq Wandroo, Richard Murrin, Shivan Pancham, John Gillson, Yasmin Hasan                                                                                                                                                        | 25            |
| Darent Valley Hospital             | Anil Kamat, Tariq Shafi, Raphael Ezekwesili, Pavel Kotouчек, Lalita Banerjee                                                                                                                                                      | 23            |
| Heartlands Hospital                | Guy Pratt, Bhuvan Kishore, Don Milligan, Joanne Ewing, Clare Gardner, Hauder Hussein, Jonathan Lancashire, Manos Nikolousis, Neil Smith, Richard Lovell, Shanhara Paneesha                                                        | 21            |
| Northampton General Hospital       | Alistair McGrann, Angela Bowen, Jane Parker, Sajjan Mittal, Suchi Krishnanurthy, George Cherian, Philip George, Rebecca Allchin                                                                                                   | 19            |
| Ulster Hospital, Belfast           | Jeremy Hamilton, Moulod El-Agnaf, Yong Lee Ong, Adnan Alshoufi, Anna Elliott, Barbara Black, Margaret Bowers                                                                                                                      | 18            |
| Wrexham Maelor Hospital            | Lally Desoysa, David Watson                                                                                                                                                                                                       | 18            |
| Castle Hill Hospital               | David Allsup, Haz Sayala, Senthil Durairaj, Andrew Fletcher, Safia Dawi                                                                                                                                                           | 17            |
| Guy's and St Thomas' Hospital      | Matthew Streetly                                                                                                                                                                                                                  | 17            |
| Salisbury District Hospital        | Jonathan Cullis, Louise Fraser, Tamara Everington, Effie Grand, Freya Collings                                                                                                                                                    | 17            |
| West Middlesex University Hospital | Magda Jabbar Al-Obaidi,                                                                                                                                                                                                           | 17            |

|                                                   |                                                                                                                   |    |
|---------------------------------------------------|-------------------------------------------------------------------------------------------------------------------|----|
|                                                   | Anna Babb, Andrew Godfrey, Andrew Hastings, John Riches                                                           |    |
| Queen Elizabeth Hospital, Kings Lynn              | Lisa Cooke, Ramaprabhahari Satheshkumar, Emma Gudgin, Kway Zin Maw, Martin Lewis, Joseph Padayatty, Mark Robinson | 16 |
| Southampton General Hospital                      | Matthew Jenner, Srinivasan Narayanan                                                                              | 14 |
| Southmead Hospital                                | Alastair Whiteway, Samreen Siddiq, Miloslav Kmonicek                                                              | 14 |
| Chesterfield Royal Hospital                       | Peter Toth, Andrew Fletcher, Emma Welch, Mark Wodzinski, Sandor Lueff                                             | 13 |
| Great Western Hospital                            | Norbert Blesing, Hala Ahmed, Alex Sternberg                                                                       | 13 |
| Queen Elizabeth Hospital, Birmingham              | Yu Sandar Aung, Mark Cook, Timothy Wong, David Burns, Manoj Raghavan                                              | 13 |
| Queen's Hospital, Romford                         | Biju Krishnan, Claire Hemmaway, Paul Greaves                                                                      | 13 |
| Royal Berkshire Hospital                          | Sadon Hassan, Henri Grech, Karthik Ramasamy, Michael Desborough, Rebecca Sampson                                  | 13 |
| Stoke Mandeville Hospital                         | Helen Eagleton, Anne-Marie O'Hea, Beena Pushkaran, Ann Watson, Naima Ansari                                       | 13 |
| Ealing Hospital                                   | Mamta Sohal, Richard Kaczmariski, Christine Liu, Angharad (Hari) Pryce, Janeta Grigorova                          | 12 |
| Manchester Royal Infirmary                        | Alberto Rocci, Simon Gibbs, Eleni Tholouli, Rajesh Krishna                                                        | 12 |
| Royal United Hospital, Bath                       | Josephine Crowe, Sally Moore, Amy Knott, Jane Norman, Jennifer Page, Karan Wadehra                                | 12 |
| Altnagelvin Hospital                              | Feargal McNicholl, Patrick Elder, Curly Morris                                                                    | 11 |
| Lincoln County Hospital                           | Kandeepan Saravanamuttu, Charlotte Kallmeyer, Caroline Harvey                                                     | 11 |
| Northwick Park Hospital                           | Charalampia Kyriakou, Robert Ayto, Nicki Panoskaltis                                                              | 11 |
| Southend University Hospital                      | Paul Cervi, Mohammed Islam                                                                                        | 11 |
| St James University Hospital                      | Gordon Cook, Charlotte Kallmeyer, Christopher Parrish                                                             | 11 |
| Wythenshawe Hospital                              | Sumaya Elhanash, Shiva Kumar Natarajan, Simon Watt                                                                | 11 |
| Stafford Hospital (Stafford)                      | Paul Revell, Avrangzeb Razzak, Andrew Amos, Ghulam Kakepoto, Mohammed Hameed                                      | 10 |
| Glangwili General Hospital                        | Sonya Goriah, Peter Cumber, Praba Gupta                                                                           | 10 |
| North Middlesex University Hospital               | Neil Rabin                                                                                                        | 10 |
| Royal Devon and Exeter Hospital                   | Claudius Rudin, Tony Todd, Loretta Ngu, Paul Kerr                                                                 | 10 |
| Wycombe Hospital                                  | Beena Pushkaran, Robin Aitchson                                                                                   | 10 |
| Calderdale Royal and Huddersfield Royal Infirmary | Sylvia Feyler, Nwe Oo, Wunna Swe, Sylvia Feyler,                                                                  | 9  |
| New Cross Hospital                                | Supratik Basu, Sophie Lee                                                                                         | 9  |
| Bradford Royal Infirmary                          | Adrian Williams, Anshu Garg, Nandini Sadasivam, William Wong                                                      | 8  |
| Broomfield Hospital                               | Vijoy Chowdhury, Finella Brito, Shereen Elshazly, Waseem Nagi                                                     | 8  |

|                                          |                                                                            |   |
|------------------------------------------|----------------------------------------------------------------------------|---|
| Warrington Hospital                      | Chandramouli Nagarajan, Jeyaprakash Ramachandran,<br>Mohamed Kaleel Rahman | 8 |
| Hereford County Hospital                 | Christopher Branner, Lisa Robinson, Sara Willoughby                        | 7 |
| Leicester Royal Infirmary                | Claire Chapman, Mamta Garg                                                 | 7 |
| Milton Keynes Hospital                   | Moez Dungaewalla, Subir Mitra                                              | 7 |
| Pilgrim Hospital Boston                  | Ciro Rinaldi, Juan Contesti, Mohammed Hameed                               | 7 |
| Royal Hampshire County Hospital          | Jennifer Arnold, Katherine Lowndes, Nigel Sargant                          | 7 |
| Royal Surrey County Hospital             | Johannes De Vos, Elizabeth Grey-Davies, Louise<br>Hendry                   | 7 |
| Craigavon Area Hospital                  | Kathryn Boyd, Donald Hull, Frank Jones, Hakim<br>Eswedi, Jonathan Palmer   | 6 |
| George Eliot Hospital                    | Mekkali Narayanan, Jagadeesh Gandla, Jhansi<br>Muddana                     | 6 |
| Good Hope Hospital                       | Vidhya Murthy, Bhuvan Kishore, Richard Lovell                              | 6 |
| Queens Hospital, Burton                  | Jawaid Channa, Humayun Ahmad, Bernhard Van<br>Staden                       | 6 |
| Royal Hallamshire Hospital               | Andrew Chantry                                                             | 6 |
| Sunderland Royal Hospital                | Shikha Chattree, Susanna Matthew, Victoria Hervey                          | 6 |
| Basildon University Hospital             | Joanne Howard, Parag Jasani                                                | 5 |
| Gloucestershire Royal Hospital           | Michael Sheilds, Asha Johny, Phil Robson, Sally Chown                      | 5 |
| University Hospital,<br>Lewisham         | Naheed Mir, Tullie Yeghen, Murugaiyan<br>Thanigaikumar                     | 5 |
| Warwick Hospital                         | Carolina Arbuthnot, Katie Randall, Anton Borg                              | 5 |
| Wexham Park Hospital                     | Mark Offer, Carolina Lahoz, Nicola Bienz                                   | 5 |
| Antrim Hospital                          | Philip Windrum, Joanne Murdock, Scott McCloskey                            | 4 |
| King's College Hospital                  | Steve Schey, Guillermo Orti                                                | 4 |
| Kingston Hospital                        | Sangeetha Atwal, Samir Zebari, Vishal Jayakar                              | 4 |
| Royal Liverpool University Hospital      | Nauman Butt, Stephen Hawkins                                               | 4 |
| Torbay Hospital                          | David Tucker, Deborah Turner, Steve Smith                                  | 4 |
| Whipps Cross Hospital                    | Sajida Kazi, Syed Rabbani                                                  | 4 |
| Basingstoke and North Hampshire Hospital | Noel Ryman                                                                 | 3 |
| Frenchay Hospital                        | Samreen Siddiq, Alastair Whiteway                                          | 3 |
| Leighton Hospital                        | Kamaraj Karunanithi                                                        | 3 |
| Queen Elizabeth Hospital (London)        | Ana Duran, Betty Cheung                                                    | 3 |
| Royal Bournemouth Hospital               | Rachel Hall                                                                | 3 |
| Withybush Hospital                       | Sumant Kundu                                                               | 3 |
| Dewsbury & District Hospital             | Mary Chapple                                                               | 2 |
| Diana, Princess of Wales Hospital        | Susan Levison-Keating                                                      | 2 |
| Dorset County Hospital                   | Akeel Moosa                                                                | 2 |
| Grantham & District Hospital             | Caroline Harvey                                                            | 2 |

|                                           |                               |            |
|-------------------------------------------|-------------------------------|------------|
| Hillingdon Hospital                       | Richard Kaczmariski           | 2          |
| Kettering General Hospital                | Mark Kwan, Matthew Lyttelton  | 2          |
| Pinderfields General Hospital (Wakefield) | Paul Moreton, Praveen Kaudlay | 2          |
| Poole Hospital                            | Fergus Jack                   | 2          |
| Pontefract General Infirmary              | David Wright                  | 2          |
| Royal Shrewsbury Hospital                 | Emma Litt, Stephen McKew      | 2          |
| Glan Clwd Hospital                        | Earnest Heartin               | 1          |
| Macclesfield District General Hospital    | John Hudson                   | 1          |
| Royal Gwent Hospital                      | Jessica Anderson              | 1          |
| North Bristol Hospital                    | -                             | 0          |
| North Devon District Hospital             | -                             | 0          |
| Tameside General Hospital                 | -                             | 0          |
| <b>Grand Total</b>                        |                               | <b>977</b> |

**Table S2: SAE severity assessment by treatment arm**

| Severity               | Levofloxacin ( N=308)<br>N (%) | Placebo(N=289)<br>N (%) | Total (N=597)<br>N (%) |
|------------------------|--------------------------------|-------------------------|------------------------|
| Mild                   | 38 (12)                        | 29 (10)                 | 67 (11)                |
| Moderate               | 136 (44)                       | 141 (49)                | 277 (46)               |
| Severe                 | 101 (33)                       | 86 (30)                 | 187 (31)               |
| Fatal/life-threatening | 32 (10)                        | 33 (11)                 | 65 (11)                |
| Unknown                | 1 (<1)                         | 0 (0)                   | 1 (<1)                 |

**Table S3: Combined events (first febrile episodes and deaths) by treatment arm**

| <b>Event category</b>     | <b>Levofloxacin<br/>(n=489)<br/>N</b> | <b>Placebo<br/>(n=488)<br/>N</b> | <b>Total<br/>(n=977)<br/>N</b> |
|---------------------------|---------------------------------------|----------------------------------|--------------------------------|
| None                      | 394                                   | 354                              | 748                            |
| Febrile episode only      | 87                                    | 112                              | 199                            |
| Death only                | 4                                     | 15                               | 19                             |
| Febrile episode and death | 4                                     | 7                                | 11                             |
| <b>Total events N (%)</b> | <b>95 (19%)</b>                       | <b>134 (27%)</b>                 | <b>229 (23%)</b>               |

**Table S4: Sites of febrile infection by treatment arm**

| Site of infection               | Levofloxacin |    | Placebo |    | Total |    |
|---------------------------------|--------------|----|---------|----|-------|----|
|                                 | N            | %  | N       | %  | N     | %  |
| Lower respiratory tract         | 39           | 47 | 49      | 51 | 88    | 49 |
| Upper respiratory tract         | 11           | 13 | 11      | 11 | 22    | 12 |
| Intravenous catheter associated | 1            | 1  | 1       | 1  | 2     | 1  |
| Bloodstream                     | 5            | 6  | 8       | 8  | 13    | 7  |
| Urinary tract infection         | 6            | 7  | 7       | 7  | 13    | 7  |
| Gastrointestinal tract          | 2            | 2  | 3       | 3  | 5     | 3  |
| Skin soft tissue                | 6            | 7  | 8       | 8  | 14    | 8  |
| Other site                      | 7            | 8  | 7       | 7  | 14    | 8  |
| Unknown                         | 6            | 7  | 1       | 1  | 7     | 4  |

There were 14 'other' reported sites of febrile infections (7 levofloxacin and 7 placebo). The 7 reported on levofloxacin being: Suspected Meningitis, Acute kidney infection, Diverticular abscess, Generalised myalgia possibly viral, Hospital Acquired Pneumonia-AKI both on diagnosis, Reaction to either Allopurinol or thalidomide, Intraoperative tear during spinal surgery where patient spiked temp after surgery, infection suspected. The 7 reported on the Placebo were: Neutropenic sepsis (2 patients), Neutropenic sepsis + Anaphylaxis type reaction, Neutropenic sepsis allergic reaction to medication, Acute cholecystitis, Fever and Atrial fibrillation, Testicles.



**Table S5: Reported potentially pathogenic or invasive isolates from local laboratories by treatment arm**

| <b>Species</b>                    | <b>Levofloxacin</b> | <b>Placebo</b>  | <b>Total</b> |
|-----------------------------------|---------------------|-----------------|--------------|
| <b>Total Gram negative</b>        | <b>6 (18%)</b>      | <b>27 (82%)</b> | <b>33</b>    |
| Enterobacteriaceae                | 4                   | 14              | 18           |
| Pseudomonas Spp.                  | 0                   | 5               | 5            |
| Other Gram negative               | 2                   | 8               | 10           |
| <b>Total Gram positive</b>        | <b>16 (44%)</b>     | <b>20 (56%)</b> | <b>36</b>    |
| Staphylococcus aureus             | 4                   | 6               | 10           |
| Streptococcus pneumoniae          | 0                   | 3               | 3            |
| Coagulase negative staphylococcus | 5                   | 5               | 10           |
| Other Gram positive               | 7                   | 6               | 13           |
| <b>Total other bacterial</b>      | <b>4 (50%)</b>      | <b>4 (50%)</b>  | <b>8</b>     |
| Anaerobe                          | 1                   | 2               | 3            |
| Mixed growth                      | 3                   | 2               | 5            |
| <b>Total Viral</b>                | <b>10 (50%)</b>     | <b>10 (50%)</b> | <b>20</b>    |
| <b>Adenovirus</b>                 | <b>1</b>            | <b>0</b>        | <b>1</b>     |
| <b>Cytomegalovirus</b>            | <b>1</b>            | <b>0</b>        | <b>1</b>     |
| Herpes simplex/Varicella          | 3                   | 0               | 3            |
| Influenza                         | 2                   | 5               | 7            |
| Metapneumovirus                   | 0                   | 2               | 2            |
| Parainfluenza                     | 2                   | 3               | 5            |
| Respiratory Syncytial Virus (RSV) | 1                   | 0               | 1            |
| <b>Candida species*</b>           | <b>8 (53%)</b>      | <b>7 (47%)</b>  | <b>15</b>    |
| <b>Total isolates</b>             | <b>44 (39%)</b>     | <b>68 (61%)</b> | <b>112</b>   |

\*Note: majority (14/15) oral/upper respiratory samples

**Table S6: Antibiograms by treatment arm**

| Antibiotic category        | Levofloxacin                    |            | Placebo                         |            |
|----------------------------|---------------------------------|------------|---------------------------------|------------|
|                            | Number sensitive /number tested | %          | Number sensitive /number tested | %          |
| Quinolone                  | 0/3                             | 0          | 7/8                             | 88         |
| Penicillin                 | 10/19                           | 53         | 16/30                           | 53         |
| Aminoglycoside             | 5/7                             | 71         | 11/13                           | 85         |
| Co-amoxiclav               | 4/5                             | 80         | 9/14                            | 64         |
| Piperacillin<br>Tazobactam | 2/2                             | 100        | 7/8                             | 88         |
| Carbapenem                 | 2/2                             | 100        | 6/6                             | 100        |
| Cephalosporin              | 2/2                             | 100        | 6/8                             | 75         |
| Other                      | 34/44                           | 76         | 62/83                           | 75         |
| <b>Total</b>               | <b>59/84</b>                    | <b>70%</b> | <b>124/170</b>                  | <b>73%</b> |

Figure S1: Treatment arm stratified by Co-trimoxazole

a) Co-trimoxazole

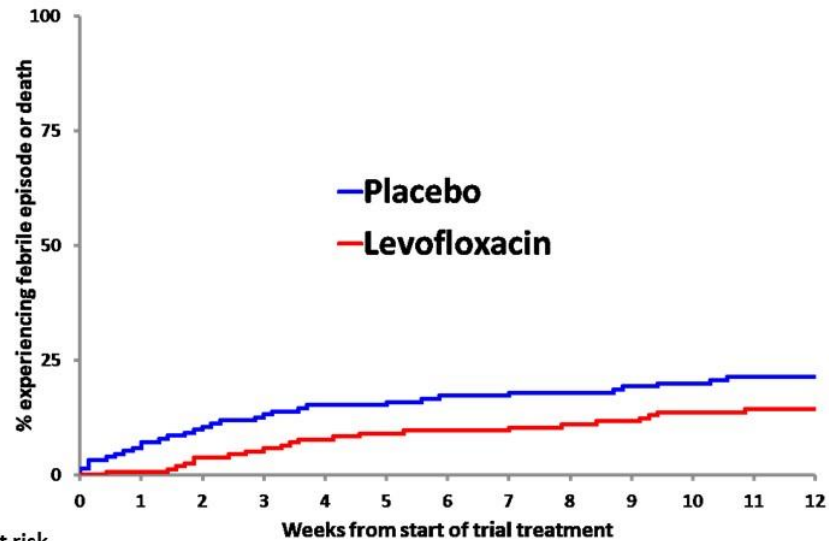

| No at risk   |     | Weeks from start of trial treatment |     |     |     |     |     |     |     |     |     |     |     |
|--------------|-----|-------------------------------------|-----|-----|-----|-----|-----|-----|-----|-----|-----|-----|-----|
|              | 0   | 1                                   | 2   | 3   | 4   | 5   | 6   | 7   | 8   | 9   | 10  | 11  | 12  |
| Placebo      | 155 | 143                                 | 136 | 132 | 127 | 126 | 122 | 120 | 119 | 117 | 116 | 112 | 112 |
| Levofloxacin | 159 | 158                                 | 151 | 146 | 141 | 139 | 137 | 136 | 134 | 131 | 128 | 127 | 126 |

b) No Co-trimoxazole

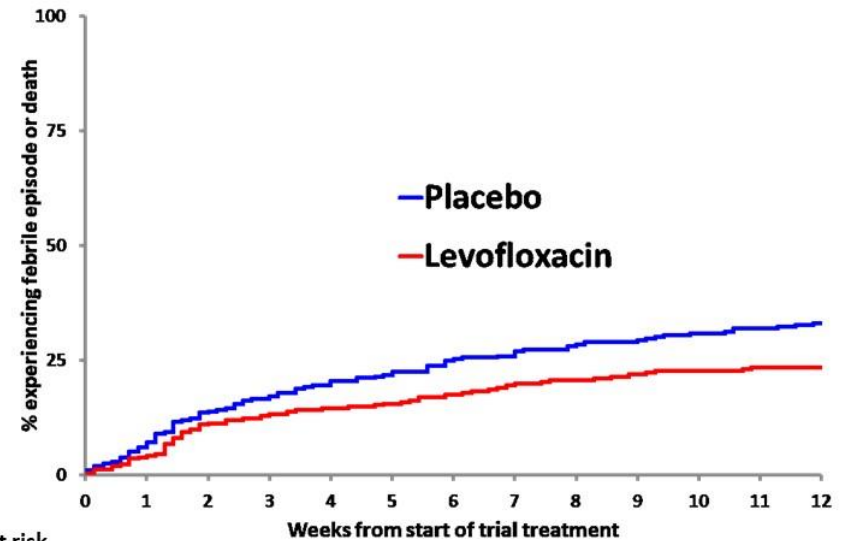

| No at risk   |     | Weeks from start of trial treatment |     |     |     |     |     |     |     |     |     |     |     |
|--------------|-----|-------------------------------------|-----|-----|-----|-----|-----|-----|-----|-----|-----|-----|-----|
|              | 0   | 1                                   | 2   | 3   | 4   | 5   | 6   | 7   | 8   | 9   | 10  | 11  | 12  |
| Placebo      | 316 | 291                                 | 264 | 254 | 241 | 231 | 219 | 213 | 206 | 199 | 193 | 190 | 185 |
| Levofloxacin | 316 | 301                                 | 274 | 268 | 259 | 252 | 244 | 236 | 228 | 220 | 215 | 211 | 211 |

Figure S2: Overall survival up to 12 months

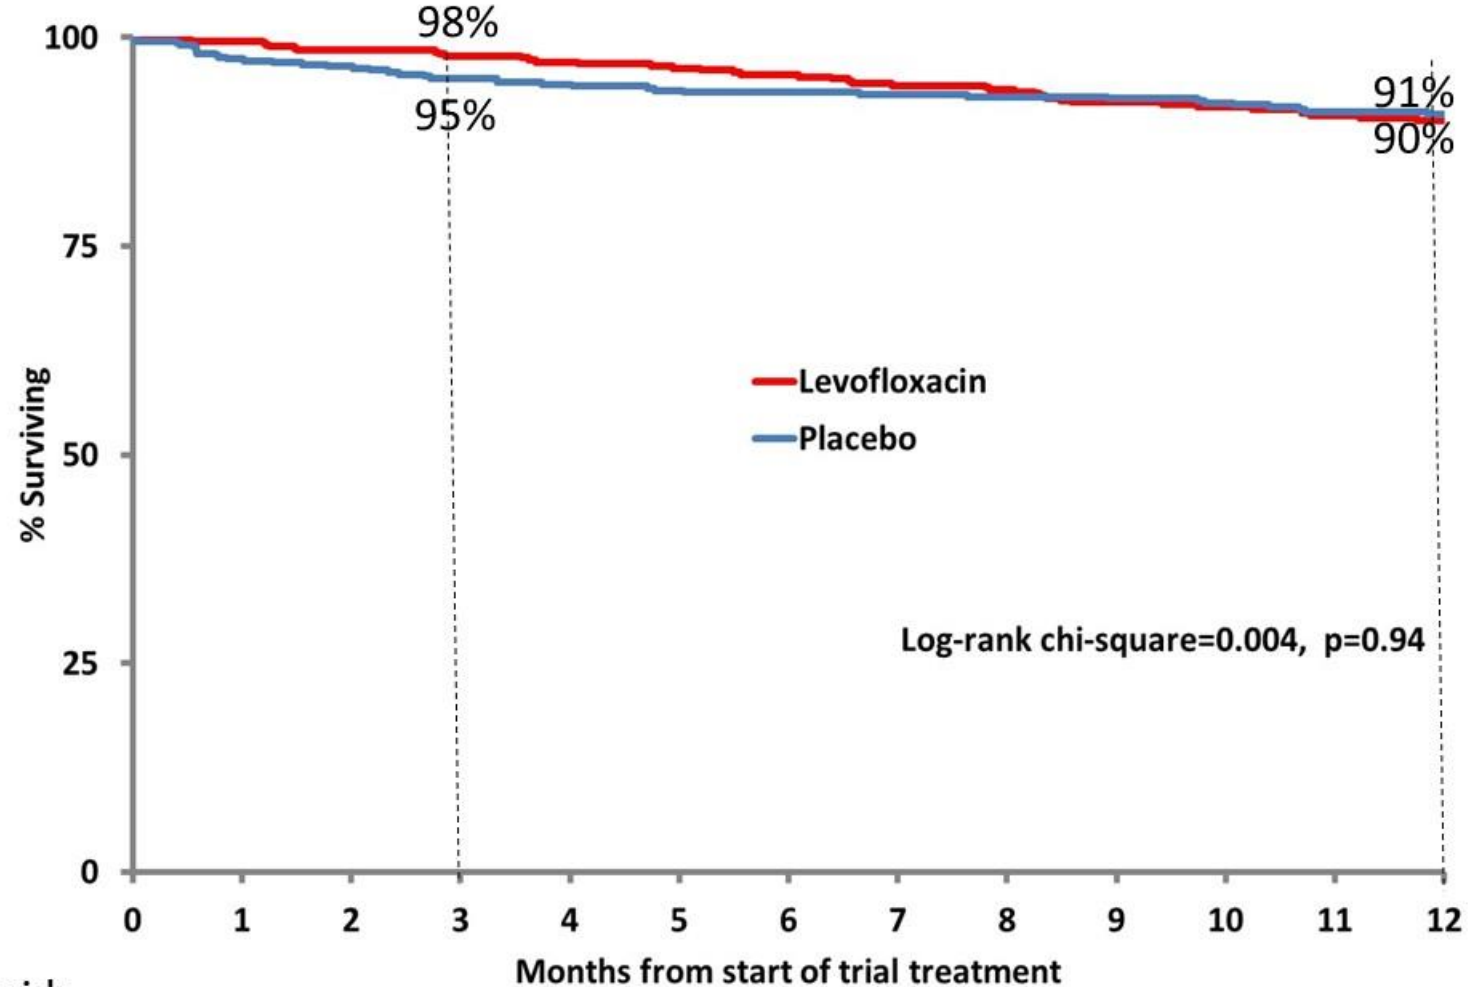

| No at risk   | 0   | 1   | 2   | 3   | 4   | 5   | 6   | 7   | 8   | 9   | 10  | 11  | 12  |
|--------------|-----|-----|-----|-----|-----|-----|-----|-----|-----|-----|-----|-----|-----|
| Levofloxacin | 489 | 461 | 439 | 426 | 401 | 380 | 374 | 371 | 368 | 363 | 359 | 356 | 342 |
| Placebo      | 488 | 446 | 420 | 405 | 393 | 378 | 373 | 373 | 371 | 370 | 369 | 365 | 356 |
